# Supplementary material for: The Association between Socioeconomic Status and Adherence to Health Check-up in Korean Adults, Based on the 2010–2012 Korean National Health and Nutrition Examination Survey
Source: PubMed Central journal article supplement — Korean J Fam Med. 2018 Mar 22;39(2):114–21. doi: 10.4082/kjfm.2018.39.2.114 (PMC5876046; doi:10.4082/kjfm.2018.39.2.114), 2018-03-22
Supplement: kjfm-39-114-s001.pdf [file kjfm-39-114-s001.pdf]

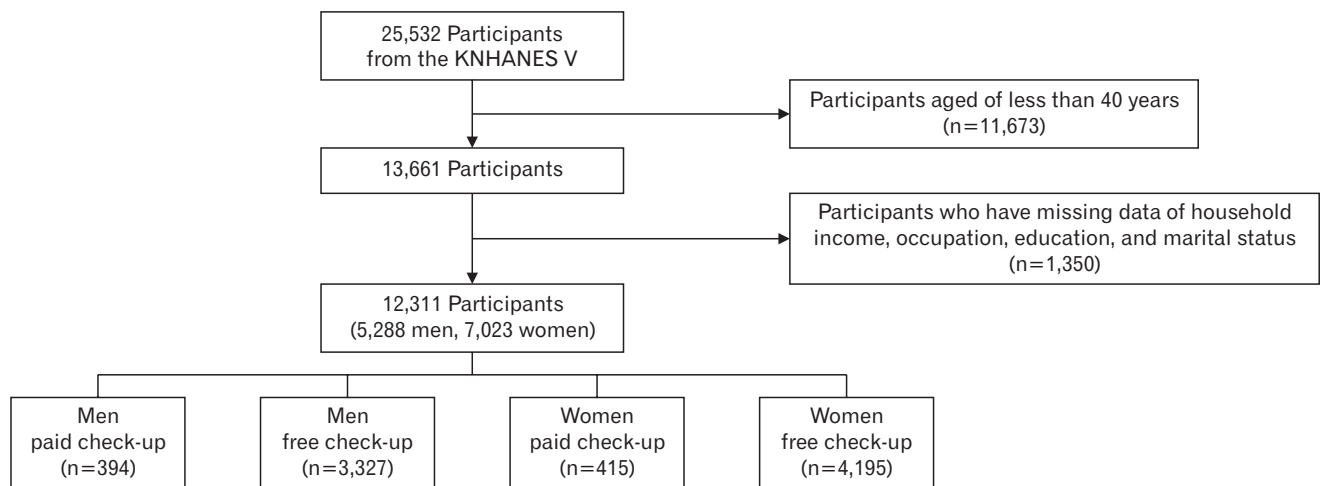

**Supplementary Figure 1.** Study population of the present study. KNHANES, Korean National Health and Nutrition Examination Survey.
